# Supplementary material for: In vitro assessment of the impact of 30 CYP2C19 variants on citalopram metabolism
Source: PeerJ. 2025 Sep 29;13:e20027. doi: 10.7717/peerj.20027 (PMC12490513; doi:10.7717/peerj.20027)
Supplement: Supplemental Information 1 — At each citalopram concentration, the data represent the mean ± SD of three technical replicates. The raw data show the differences in metabolic efficiency between the wild-type CYP2C19 and 30 other variants toward citalopram in vitro. [file peerj-13-20027-s001.xlsx]

## Sheet: Sheet1
Variant	Enzyme concentration	Citalopram (μM)	Demethylcitalopram (ng)			pmol/min/pmol			Mean	SD
CYP2C19 *1	0.75pmol/ul	10	47.7	45.64	46.75	1.36774	1.30867	1.3405	1.33897	0.0295637
		25	110.76	128.52	119.87	3.17591	3.68516	3.43713	3.43274	0.254652
		50	174.58	204.69	189.28	5.00588	5.86925	5.42738	5.43417	0.431725
		100	295.64	309.45	301.3	8.47713	8.87312	8.63943	8.66323	0.199063
		200	397.84	402.59	400.16	11.4076	11.5438	11.4741	11.4752	0.0681064
		500	583.65	533.22	538.92	16.7355	15.2895	15.4529	15.8259	0.791907
		1000	601.93	590.94	600.05	17.2596	16.9445	17.2057	17.1366	0.168545
		1500	602.86	605.18	604.97	17.2863	17.3528	17.3468	17.3286	0.0367924
Variant	Enzyme concentration	Citalopram (μM)	Demethylcitalopram (ng)			pmol/min/pmol			Mean	SD
CYP2C19 *2C (A161P)	0.81pmol/ul	10	18.77	18.42	18.79	0.498341	0.489048	0.498872	0.49542	0.00552467
		25	39.56	44.68	41.87	1.05031	1.18625	1.11164	1.11607	0.0680756
		50	69.87	58.22	64.62	1.85504	1.54573	1.71565	1.70547	0.154904
		100	84.65	103.66	94.12	2.24744	2.75216	2.49887	2.49949	0.252357
		200	121.41	119.17	120.48	3.22342	3.16395	3.19873	3.19536	0.0298781
		500	160.26	166.63	163.74	4.25488	4.424	4.34727	4.34205	0.0846821
		1000	196.88	180.93	187.57	5.22713	4.80366	4.97995	5.00358	0.212722
		1500	186.24	189.3	185.25	4.94464	5.02589	4.91836	4.96296	0.0560554
Variant	Enzyme concentration	Citalopram (μM)	Demethylcitalopram (ng)			pmol/min/pmol			Mean	SD
CYP2C19*2E (M271I)	1.27pmol/ul	10	51.64	42.72	33.49	0.874439	0.723393	0.567098	0.721644	0.153678
		25	115.02	85.28	88.12	1.94768	1.44408	1.49217	1.62797	0.277912
		50	211.9	180.84	182.15	3.58818	3.06223	3.08441	3.24494	0.297461
		100	379.59	305.33	341.48	6.42774	5.17027	5.78241	5.79347	0.628809
		200	499.72	512.27	463.47	8.46194	8.67446	7.84811	8.32817	0.429109
		500	618.22	598.38	596.61	10.4685	10.1326	10.1026	10.2346	0.203171
		1000	661.72	673.71	675	11.2051	11.4082	11.43	11.3478	0.124008
		1500	673.26	709.07	673.25	11.4006	12.0069	11.4004	11.6026	0.350145
Variant	Enzyme concentration	Citalopram (μM)	Demethylcitalopram (ng)			pmol/min/pmol			Mean	SD
CYP2C19*2F (D341N)	1.68pmol/ul	10	46.59	54.68	50.76	0.59639	0.699949	0.64977	0.648703	0.0517876
		25	155.39	90.94	131.96	1.98912	1.16411	1.6892	1.61414	0.417596
		50	194.96	271.53	210.14	2.49565	3.47581	2.68996	2.88714	0.518976
		100	398.57	362.53	379.68	5.10202	4.64068	4.86022	4.86764	0.23076
		200	421.02	491.49	454.3	5.3894	6.29147	5.81541	5.8321	0.451268
		500	578.81	616.38	598.6	7.40924	7.89017	7.66257	7.65399	0.240578
		1000	612.11	638.14	623.03	7.83551	8.16871	7.97529	7.99317	0.167321
		1500	655.7	635.07	634.79	8.3935	8.12942	8.12583	8.21625	0.153512
Variant	Enzyme concentration	Citalopram (μM)	Demethylcitalopram (ng)			pmol/min/pmol			Mean	SD
CYP2C19*2G (D360V)	0.93pmol/ul	10	27.62	34.94	30.83	0.638687	0.807955	0.712915	0.719852	0.084847
		25	71.87	72.25	71.53	1.66193	1.67071	1.65406	1.66223	0.00832894
		50	120.08	144.75	127.36	2.77674	3.34721	2.94508	3.02301	0.29311
		100	265.54	220.35	230.77	6.14036	5.09539	5.33634	5.52403	0.547188
		200	331.96	333.31	343.74	7.67626	7.70748	7.94866	7.77747	0.149079
		500	472.92	423.65	457.5	10.9358	9.79651	10.5793	10.4372	0.582795
		1000	472.43	506.61	474.56	10.9245	11.7149	10.9738	11.2044	0.442793
		1500	523.27	521.13	514.09	12.1001	12.0506	11.8878	12.0129	0.111065
Variant	Enzyme concentration	Citalopram (μM)	Demethylcitalopram (ng)			pmol/min/pmol			Mean	SD
CYP2C19*2H (H396D)	0.75pmol/ul	10	25.43	37.17	33.76	0.729176	1.06581	0.968029	0.921004	0.173172
		25	74.6	84.27	79.15	2.13907	2.41634	2.26953	2.27498	0.138718
		50	140.1	121.56	130.56	4.0172	3.48559	3.74366	3.74882	0.265844
		100	287.1	230.75	257.9	8.23226	6.61649	7.39498	7.41458	0.808063
		200	381.55	355.55	367.32	10.9405	10.195	10.5325	10.556	0.373316
		500	451.62	454.33	452.19	12.9497	13.0274	12.966	12.981	0.0409688
		1000	551.14	508.47	507.72	15.8033	14.5798	14.5583	14.9805	0.712684
		1500	535.74	520.41	529.49	15.3617	14.9222	15.1825	15.1555	0.22103
Variant	Enzyme concentration	Citalopram (μM)	Demethylcitalopram (ng)			pmol/min/pmol			Mean	SD
CYP2C19*2J (K421Q)	1.51pmol/ul	10	51.83	43.99	44.78	0.738161	0.626504	0.637755	0.667474	0.0614752
		25	89.41	111.99	102.63	1.27337	1.59496	1.46165	1.44333	0.161573
		50	149.15	236.84	195.32	2.12419	3.37307	2.78174	2.75967	0.624732
		100	430.26	411.05	422.46	6.12775	5.85416	6.01666	5.99953	0.137597
		200	476.29	508.57	493.19	6.78331	7.24304	7.024	7.01678	0.22995
		500	684.23	679.04	708.21	9.74478	9.67087	10.0863	9.83399	0.221619
		1000	790.48	811.32	820.79	11.258	11.5548	11.6897	11.5008	0.220841
		1500	810.62	826.72	810.32	11.5448	11.7741	11.5406	11.6198	0.133634
Variant	Enzyme concentration	Citalopram (μM)	Demethylcitalopram (ng)			pmol/min/pmol			Mean	SD
CYP2C19*3C (M136K)	1.17pmol/ul	10	52.5	60.23	56.75	0.964985	1.10707	1.0431	1.03838	0.0711587
		25	145.46	133.94	139.86	2.67365	2.46191	2.57072	2.56876	0.105886
		50	239.46	292.77	165.53	4.40143	5.38131	3.04255	4.2751	1.17449
		100	518.99	503.81	511.35	9.53938	9.26036	9.39895	9.39956	0.13951
		200	590.14	618.44	603.96	10.8472	11.3673	11.1012	11.1052	0.26011
		500	801.48	757.09	858.92	14.7317	13.9158	15.7875	14.8117	0.93841
		1000	1011.8	1023.61	1000.55	18.5976	18.8146	18.3908	18.601	0.21195
		1500	1110.87	1050.79	1024.97	20.4185	19.3142	18.8396	19.5241	0.810109
Variant	Enzyme concentration	Citalopram (μM)	Demethylcitalopram (ng)			pmol/min/pmol			Mean	SD
CYP2C19*6 (R132Q)	1.34pmol/ul	10	21.77	22.96	21.43	0.349382	0.36848	0.343926	0.353929	0.0128934
		25	46.6	52.41	48.2	0.747874	0.841117	0.773552	0.787514	0.0481643
		50	89.13	81.88	79.13	1.43043	1.31407	1.26994	1.33815	0.082908
		100	96.62	96.49	98.19	1.55063	1.54855	1.57583	1.55834	0.0151854
		200	124.46	134.47	152.73	1.99743	2.15808	2.45113	2.20221	0.230047
		500	192.74	198.97	200.62	3.09324	3.19323	3.21971	3.16873	0.0666974
		1000	243.25	221.71	243.17	3.90387	3.55818	3.90258	3.78821	0.199215
		1500	247.8	240.51	234.82	3.97689	3.85989	3.76858	3.86845	0.10442
Variant	Enzyme concentration	Citalopram (μM)	Demethylcitalopram (ng)			pmol/min/pmol			Mean	SD
CYP2C19*18 (R329H)	1.91pmol/ul	10	44.87	42.46	43.87	0.505207	0.478072	0.493948	0.492409	0.0136328
		25	91.98	98.8	94.71	1.03564	1.11242	1.06637	1.07148	0.038648
		50	163.83	162.48	163.19	1.84462	1.82942	1.83741	1.83715	0.00760347
		100	277.48	269.13	273.03	3.12425	3.03023	3.07414	3.07621	0.0470418
		200	341.41	336.33	338.94	3.84406	3.78686	3.81625	3.81572	0.0286024
		500	452.95	458.98	450.46	5.09993	5.16782	5.07189	5.11321	0.0493256
		1000	528.25	530.75	529.85	5.94776	5.9759	5.96577	5.96314	0.0142569
		1500	521.17	513.83	520.43	5.86804	5.7854	5.85971	5.83772	0.0455003
Variant	Enzyme concentration	Citalopram (μM)	Demethylcitalopram (ng)			pmol/min/pmol			Mean	SD
CYP2C19*23(G91R)	0.27pmol/ul	10	27.57	21.46	25.44	2.19594	1.70928	2.02628	1.97717	0.247019
		25	47.36	49.38	48.02	3.7722	3.93309	3.82477	3.84336	0.0820403
		50	71.41	91.8	80.56	5.68777	7.31183	6.41657	6.47206	0.813448
		100	144.46	146.21	145.09	11.5062	11.6456	11.5564	11.5694	0.0705981
		200	180.21	163.01	171.24	14.3536	12.9837	13.6392	13.6588	0.685197
		500	238.2	233.81	238.4	18.9725	18.6229	18.9885	18.8613	0.206629
		1000	292.8	265.29	264.18	23.3214	21.1302	21.0418	21.8311	1.29135
		1500	269.14	281.75	263.83	21.4369	22.4413	21.0139	21.6307	0.733133
Variant	Enzyme concentration	Citalopram (μM)	Demethylcitalopram (ng)			pmol/min/pmol			Mean	SD
CYP2C19*29 (K28I)	0.31pmol/ul	10	41.59	36.57	39.13	2.88519	2.53694	2.71453	2.71222	0.174136
		25	94.72	84.75	88.25	6.57093	5.87929	6.1221	6.19077	0.350898
		50	174.73	167.49	170.87	12.1214	11.6191	11.8536	11.8647	0.251311
		100	286.27	279.14	282.9	19.8592	19.3646	19.6254	19.6164	0.247435
		200	477.21	472.3	450.32	33.1051	32.7645	31.2397	32.3698	0.99338
		500	500.59	507.35	533.06	34.727	35.196	36.9795	35.6342	1.18847
		1000	571.21	591.99	580.65	39.6261	41.0676	40.281	40.3249	0.721781
		1500	630.8	639.27	632.93	43.76	44.3476	43.9077	44.0051	0.305649
Variant	Enzyme concentration	Citalopram (μM)	Demethylcitalopram (ng)			pmol/min/pmol			Mean	SD
CYP2C19*30 (R73C)	1.83pmol/ul	10	32.2	31.85	31.95	0.378401	0.374288	0.375463	0.37605	0.00211854
		25	66.48	77.63	73.96	0.781244	0.912275	0.869146	0.854222	0.0667778
		50	158.48	151.59	154.4	1.86239	1.78142	1.81444	1.81942	0.0407128
		100	294.7	258.16	278.01	3.46319	3.03379	3.26705	3.25468	0.214969
		200	409.91	382.37	396.77	4.81709	4.49345	4.66267	4.65774	0.161876
		500	511.99	582.61	550.86	6.01669	6.84658	6.47347	6.44558	0.41565
		1000	553.93	556.14	550.17	6.50955	6.53552	6.46536	6.50348	0.0354704
		1500	551.92	554.48	556.86	6.48593	6.51601	6.54398	6.51531	0.0290328
Variant	Enzyme concentration	Citalopram (μM)	Demethylcitalopram (ng)			pmol/min/pmol			Mean	SD
CYP2C19*31(H78Y)	1.82pmol/ul	10	33.77	28.75	31.67	0.399031	0.339714	0.374217	0.370987	0.0297901
		25	83.21	80.87	81.56	0.983221	0.955571	0.963724	0.967506	0.0142074
		50	179.58	169.77	174.28	2.12194	2.00603	2.05932	2.06243	0.0580208
		100	357.78	391.83	375.05	4.22758	4.62992	4.43164	4.42971	0.201177
		200	495.16	491.66	492.43	5.85088	5.80952	5.81862	5.82634	0.0217322
		500	719.17	720.22	720.71	8.49781	8.51022	8.51601	8.50802	0.00929678
		1000	717.65	732.9	725.62	8.47985	8.66005	8.57403	8.57131	0.0901288
		1500	752.55	786.29	770.41	8.89224	9.29091	9.10327	9.09547	0.199453
Variant	Enzyme concentration	Citalopram (μM)	Demethylcitalopram (ng)			pmol/min/pmol			Mean	SD
CYP2C19*32 (H99R)	1.81pmol/ul	10	42.54	48.43	45.28	0.505436	0.575417	0.537991	0.539615	0.035019
		25	101.64	99.77	100.42	1.20763	1.18541	1.19313	1.19539	0.0112798
		50	205.08	230.84	220.97	2.43664	2.74271	2.62544	2.6016	0.154419
		100	497.21	460.45	478.31	5.90756	5.4708	5.683	5.68712	0.21841
		200	755.53	606.9	678.17	8.97677	7.21084	8.05762	8.08174	0.883215
		500	841.69	823.04	830.86	10.0005	9.77889	9.8718	9.88372	0.111274
		1000	866.26	828.84	843.02	10.2924	9.8478	10.0163	10.0522	0.224463
		1500	833.68	837.13	838.67	9.90531	9.9463	9.96459	9.93873	0.0303594
Variant	Enzyme concentration	Citalopram (μM)	Demethylcitalopram (ng)			pmol/min/pmol			Mean	SD
CYP2C19*33 (D188N)	1.83pmol/ul	10	47.59	37.6	42.81	0.559257	0.441859	0.503085	0.5014	0.0587172
		25	111.36	99.27	104.33	1.30866	1.16658	1.22604	1.23376	0.0713519
		50	240.13	236.91	237.67	2.8219	2.78406	2.793	2.79966	0.0197794
		100	403.92	454.14	427.69	4.74669	5.33686	5.02603	5.03653	0.295222
		200	605.79	548.08	575.87	7.11898	6.4408	6.76738	6.77572	0.339169
		500	824.96	695.85	750.58	9.69458	8.17733	8.82049	8.89747	0.761546
		1000	823.64	836.82	829.55	9.67906	9.83395	9.74852	9.75384	0.0775802
		1500	833.02	831.4	833.12	9.78929	9.77026	9.79047	9.78334	0.0113458
Variant	Enzyme concentration	Citalopram (μM)	Demethylcitalopram (ng)			pmol/min/pmol			Mean	SD
N231T	1.35pmol/ul	10	41.69	43.68	42.23	0.664118	0.695818	0.67272	0.677552	0.0163934
		25	91.88	89.91	90.09	1.46364	1.43226	1.43513	1.44367	0.01735
		50	190.97	193.15	191.47	3.04213	3.07686	3.0501	3.05637	0.0181917
		100	356.75	302.83	328.52	5.68299	4.82405	5.23329	5.24678	0.429629
		200	407.05	371.47	385.15	6.48427	5.91748	6.1354	6.17905	0.285903
		500	590.91	592.34	587.81	9.41314	9.43592	9.36376	9.40427	0.0368895
		1000	648.64	628.37	629.19	10.3328	10.0099	10.0229	10.1219	0.182772
		1500	660.29	613.35	630.64	10.5184	9.77061	10.046	10.1117	0.378171
Variant	Enzyme concentration	Citalopram (μM)	Demethylcitalopram (ng)			pmol/min/pmol			Mean	SD
R124Q	1.29pmol/ul	10	28.91	27.08	27.66	0.481954	0.451446	0.461115	0.464838	0.0155909
		25	102.72	93.45	96.47	1.71243	1.55789	1.60824	1.62618	0.0788173
		50	150.23	193.87	172.58	2.50446	3.23197	2.87705	2.87116	0.363793
		100	341.68	349.03	301.6	5.69609	5.81862	5.02792	5.51421	0.425571
		200	412.9	422.89	397.02	6.88339	7.04993	6.61865	6.85066	0.217492
		500	468.44	453.47	495.28	7.80929	7.55972	8.25673	7.87525	0.353154
		1000	543.02	547.14	536.73	9.0526	9.12128	8.94774	9.04054	0.0873978
		1500	537.3	550.39	543.91	8.95724	9.17546	9.06743	9.06671	0.109112
Variant	Enzyme concentration	Citalopram (μM)	Demethylcitalopram (ng)			pmol/min/pmol			Mean	SD
R261W	1.14pmol/ul	10	33.77	30.51	31.53	0.63705	0.575552	0.594793	0.602465	0.0314585
		25	67.78	74.81	70.19	1.27863	1.41124	1.32409	1.33799	0.0673916
		50	104.77	124.63	113.3	1.97642	2.35107	2.13733	2.15494	0.187943
		100	196.86	216.21	204.12	3.71364	4.07866	3.85059	3.88097	0.184398
		200	265.86	251.41	257.25	5.01528	4.74269	4.85286	4.87028	0.137127
		500	299.52	378.33	335.21	5.65025	7.13696	6.32352	6.37024	0.744451
		1000	346.2	366.35	376.82	6.53084	6.91096	7.10847	6.85009	0.293585
		1500	367.62	374.71	372.19	6.93492	7.06867	7.02113	7.00824	0.0677996
Variant	Enzyme concentration	Citalopram (μM)	Demethylcitalopram (ng)			pmol/min/pmol			Mean	SD
S303N	1.2pmol/ul	10	71.68	67.94	68.48	1.28459	1.21756	1.22724	1.24313	0.0362279
		25	162.81	150.88	156.69	2.91774	2.70394	2.80806	2.80992	0.106912
		50	320.89	292.38	310.39	5.75072	5.23978	5.56254	5.51768	0.258403
		100	440.37	464.04	451.92	7.89194	8.31613	8.09892	8.10233	0.212117
		200	577.97	585.41	560.38	10.3579	10.4912	10.0427	10.2973	0.230348
		500	626.81	609.75	627.73	11.2332	10.9274	11.2496	11.1367	0.181463
		1000	697.46	708.01	705.32	12.4993	12.6884	12.6401	12.6093	0.0982449
		1500	674.65	691.73	672.2	12.0905	12.3966	12.0466	12.1779	0.190666
Variant	Enzyme concentration	Citalopram (μM)	Demethylcitalopram (ng)			pmol/min/pmol			Mean	SD
I327T	1.78pmol/ul	10	47.01	48.62	46.75	0.567959	0.587411	0.564818	0.573396	0.0122383
		25	104.21	97.79	101.43	1.25903	1.18147	1.22544	1.22198	0.038898
		50	148.84	170.83	158.2	1.79824	2.06391	1.91132	1.92449	0.133327
		100	246.26	266.76	255.18	2.97523	3.22291	3.083	3.09371	0.124184
		200	348.16	346.63	347.74	4.20635	4.18787	4.20128	4.1985	0.00955064
		500	431.83	435.18	433.47	5.21723	5.2577	5.23704	5.23732	0.0202383
		1000	453.52	474.24	476.19	5.47928	5.72961	5.75317	5.65402	0.151788
		1500	526.64	513.12	500.83	6.36269	6.19935	6.05086	6.2043	0.155973
Variant	Enzyme concentration	Citalopram (μM)	Demethylcitalopram (ng)			pmol/min/pmol			Mean	SD
A430V	1.35pmol/ul	10	41.92	40.79	40.33	0.667782	0.649781	0.642453	0.653339	0.0130337
		25	113.34	97.49	105.39	1.8055	1.55301	1.67885	1.67912	0.126245
		50	181.43	208.36	194.86	2.89016	3.31916	3.1041	3.10447	0.214496
		100	283.63	315.48	298.94	4.5182	5.02557	4.76209	4.76862	0.253747
		200	396.77	385.76	391.24	6.32051	6.14512	6.23242	6.23268	0.0876944
		500	481.3	481.3	480.99	7.66706	7.66706	7.66213	7.66542	0.00285111
		1000	580.79	567.75	573.23	9.25193	9.04421	9.1315	9.14255	0.104303
		1500	561.69	583.86	570.42	8.94767	9.30084	9.08674	9.11175	0.177906
Variant	Enzyme concentration	Citalopram (μM)	Demethylcitalopram (ng)			pmol/min/pmol			Mean	SD
R125G	1.72pmol/ul	10	45.16	42.32	41.99	0.564641	0.529132	0.525006	0.539593	0.02179
		25	95.99	96.5	95.7	1.20018	1.20655	1.19655	1.20109	0.00506389
		50	183.46	200.73	190.38	2.29382	2.50975	2.38035	2.39464	0.108672
		100	298.12	346.47	323.69	3.72743	4.33196	4.04714	4.03551	0.302431
		200	436.94	425.08	431.36	5.46312	5.31483	5.39335	5.39043	0.0741866
		500	617.53	619.37	619.37	7.72106	7.74406	7.74406	7.73639	0.0132824
		1000	794.92	756.93	762.64	9.93898	9.46399	9.53538	9.64612	0.256128
		1500	751.55	701.87	725.58	9.39672	8.77557	9.07202	9.08144	0.310685
Variant	Enzyme concentration	Citalopram (μM)	Demethylcitalopram (ng)			pmol/min/pmol			Mean	SD
N277K	1.1pmol/ul	10	65.58	59.3	62.01	1.28211	1.15934	1.21232	1.21792	0.0615796
		25	144.58	162.83	158.34	2.82659	3.18338	3.0956	3.03519	0.18591
		50	281.02	290.38	285.11	5.49404	5.67703	5.574	5.58169	0.0917376
		100	444.25	487.02	463.09	8.68524	9.52141	9.05357	9.08674	0.41907
		200	573.9	551.53	560.58	11.2199	10.7826	10.9595	10.9874	0.219994
		500	741.29	743.9	742.96	14.4925	14.5435	14.5251	14.5204	0.0258437
		1000	877.24	860.68	868.21	17.1503	16.8266	16.9738	16.9836	0.162098
		1500	876.16	871.31	866.82	17.1292	17.0344	16.9466	17.0368	0.0913227
Variant	Enzyme concentration	Citalopram (μM)	Demethylcitalopram (ng)			pmol/min/pmol			Mean	SD
N403I	1.65pmol/ul	10	53.89	61.86	54.76	0.702379	0.806256	0.713718	0.740784	0.0569831
		25	117.01	135.82	126.32	1.52506	1.77022	1.6464	1.64722	0.122583
		50	257.26	268.97	262.44	3.35301	3.50564	3.42053	3.42639	0.0764804
		100	367.35	366.91	367.19	4.78788	4.78214	4.78579	4.78527	0.00290271
		200	430.09	419.17	425.04	5.6056	5.46328	5.53978	5.53622	0.0712301
		500	516.27	595.36	558.27	6.72884	7.75966	7.27625	7.25491	0.515743
		1000	576.96	552.84	560.1	7.51984	7.20547	7.3001	7.34181	0.161281
		1500	579.16	585.41	580.13	7.54852	7.62998	7.56116	7.57988	0.0438394
Variant	Enzyme concentration	Citalopram (μM)	Demethylcitalopram (ng)			pmol/min/pmol			Mean	SD
M255T	1.05pmol/ul	10	37.12	38.22	37.11	0.760266	0.782796	0.760061	0.767708	0.0130669
		25	84.43	85.07	84.29	1.72924	1.74235	1.72637	1.73265	0.00851721
		50	138.49	155.94	144.89	2.83646	3.19386	2.96754	2.99928	0.180802
		100	195.76	197.37	196.23	4.00942	4.0424	4.01905	4.02362	0.0169567
		200	297.36	258.71	276.19	6.09032	5.29872	5.65673	5.68193	0.396402
		500	408.58	401.83	404.7	8.36825	8.23001	8.28879	8.29568	0.0693819
		1000	480.05	464.8	468.82	9.83205	9.51971	9.60205	9.65127	0.161884
		1500	471.74	472.94	482.1	9.66185	9.68643	9.87404	9.74077	0.116063
Variant	Enzyme concentration	Citalopram (μM)	Demethylcitalopram (ng)			pmol/min/pmol			Mean	SD
T130M	0..45pmol/ul	10	30.37	34.62	41.44	1.45137	1.65448	1.98041	1.69542	0.266882
		25	97.7	82.85	97.49	4.66906	3.95938	4.65902	4.42915	0.406866
		50	196.25	189.21	228.43	9.37873	9.04229	10.9166	9.77921	0.999274
		100	319.68	295.91	308.7	15.2774	14.1415	14.7527	14.7239	0.56853
		200	496.01	411.26	453.41	23.7042	19.654	21.6683	21.6755	2.0251
		500	608.76	609.89	600.75	29.0925	29.1465	28.7097	28.9829	0.238132
		1000	642.82	670.09	641.29	30.7202	32.0234	30.6471	31.1302	0.774389
		1500	691.83	626.55	671.27	33.0624	29.9427	32.0798	31.6949	1.59507
Variant	Enzyme concentration	Citalopram (μM)	Demethylcitalopram (ng)			pmol/min/pmol			Mean	SD
L16F	0.57pmol/ul	10	57.66	56.26	55.27	2.17544	2.12262	2.08527	2.12777	0.0453064
		25	131.88	164.42	137.46	4.97566	6.20336	5.18619	5.45507	0.656529
		50	243.26	231.12	230.17	9.17789	8.71986	8.68402	8.86059	0.275372
		100	433.38	384.94	411.25	16.3509	14.5233	15.5159	15.4634	0.914923
		200	524	663.64	600.57	19.7699	25.0383	22.6587	22.489	2.63832
		500	830.6	929.13	896.72	31.3375	35.0549	33.8321	33.4082	1.89462
		1000	1002.49	1056.39	1033.03	37.8227	39.8563	38.9749	38.8846	1.01979
		1500	937.55	1052.22	998.04	35.3726	39.6989	37.6548	37.5754	2.16427
Variant	Enzyme concentration	Citalopram (μM)	Demethylcitalopram (ng)			pmol/min/pmol			Mean	SD
I331V	1.58pmol/ul	10	44.7	50.81	47.25	0.608412	0.691575	0.64312	0.647702	0.0417705
		25	118.47	129.89	123.07	1.61249	1.76793	1.67511	1.68518	0.0782068
		50	193.93	187.09	189.46	2.63958	2.54648	2.57874	2.58827	0.0472752
		100	309.45	333.51	311.87	4.21192	4.5394	4.24486	4.33206	0.180316
		200	372.81	389.92	380.6	5.07432	5.3072	5.18035	5.18729	0.116597
		500	499.05	489.65	494.31	6.79257	6.66463	6.72805	6.72842	0.0639725
		1000	530.56	517.4	526.77	7.22145	7.04233	7.16987	7.14455	0.0922049
		1500	540.55	523.75	531.82	7.35742	7.12876	7.2386	7.2416	0.114362
CYP2C19*3 (W212X) and 35SF were no metabolic product detected.
